# Supplementary material
Source: publisher figshare collection journal article supplement (https://acs.figshare.com/ndownloader/files/27454471)
Supplement: Supplementary file 1 [file 27454471]

# Supporting Information for Deciphering the Intense Postgap Absorptions of Monolayer Transition Metal Dichalcogenides

Jinhua Hong<sup>\*†</sup>, Masanori Koshino<sup>†</sup>, Ryosuke Senga<sup>†</sup>, Thomas Pichler<sup>‡</sup>, Hua Xu<sup>§</sup>, Kazu Suenaga<sup>\*†,¶</sup>

<sup>†</sup>Nanomaterials Research Institute, National Institute of Advanced Industrial Science and Technology (AIST), Tsukuba 305-8565, Japan

<sup>‡</sup>Faculty of Physics, University of Vienna, Strudlhofgasse 4, A-1090 Vienna, Austria

<sup>§</sup>Key Laboratory of Applied Surface and Colloid Chemistry, School of Materials Science and Engineering, Shaanxi Normal University, Xi'an 710119, P. R. China

<sup>¶</sup>The Institute of Scientific and Industrial Research (ISIR-SANKEN), Osaka University, Ibaraki 567-0047, Japan

\*Email: jinhuahong436@gmail.com (J. H.), or suenaga-kazu@sanken.osaka-u.ac.jp (K. S.)

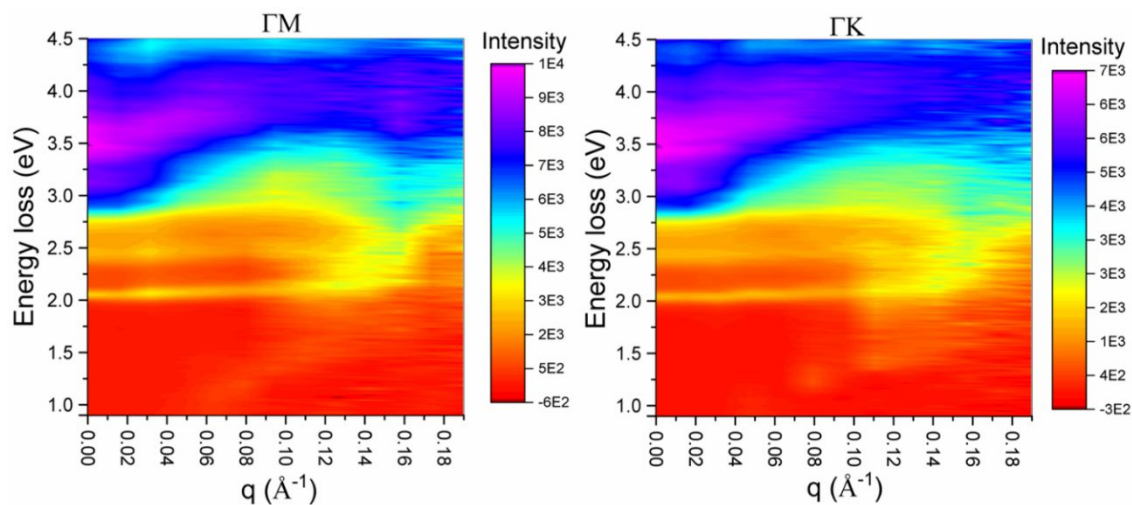

**Figure S1.** The  $q$ -E diagrams of monolayer WS<sub>2</sub> along  $\Gamma$ M and  $\Gamma$ K directions. No obvious in-plane anisotropy was found for all excitons.

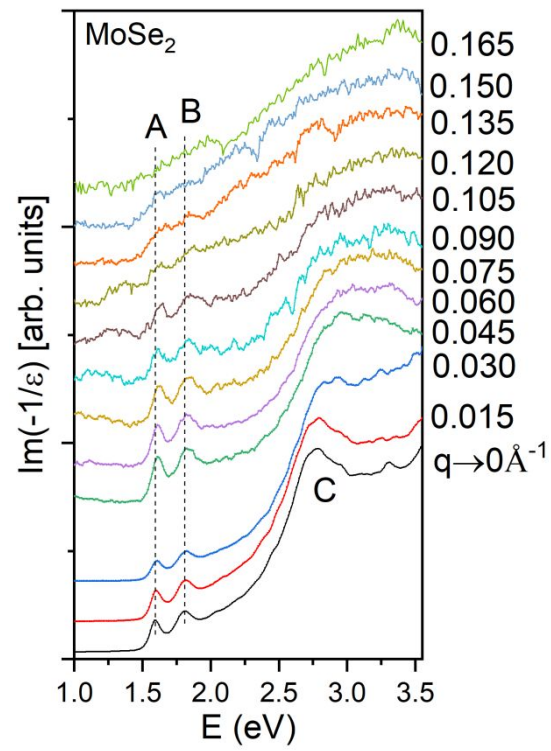

**Figure S2.** Experimental  $q$ -EELS loss functions of monolayer MoSe<sub>2</sub> along  $\Gamma$ K direction.

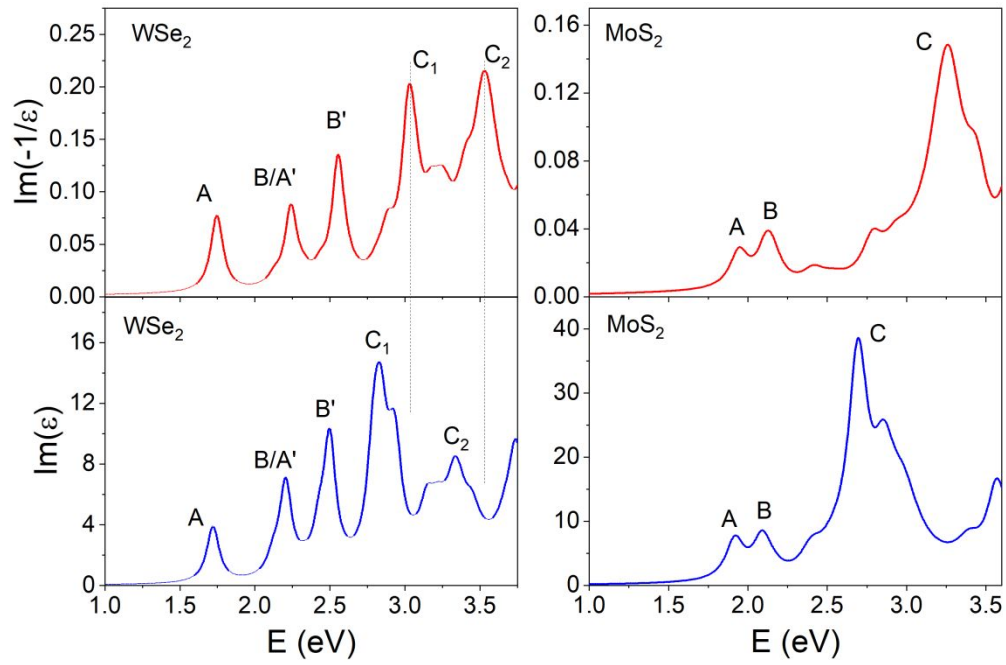

**Figure S3.** Theoretical EELS loss function  $\text{Im}(-1/\epsilon)$  and optical absorption  $\text{Im}(\epsilon)$  of TMDCs calculated by BSE+SOC at zero- $q$  excitation. Note that the peaks in the optical absorption always have lower energy than their EELS counterparts, which is common according to the Kramers Heisenberg relation.

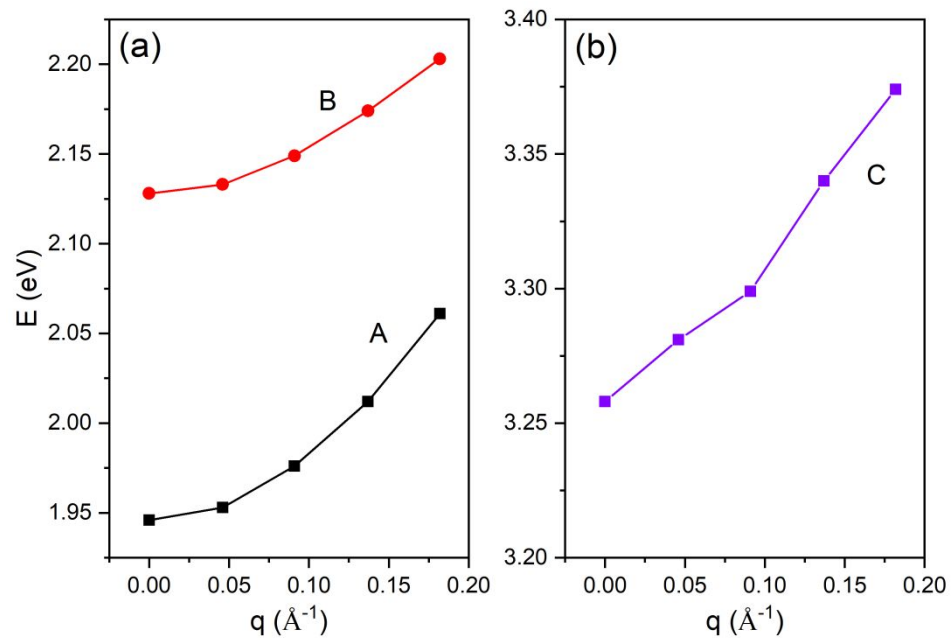

**Figure S4.** Theoretical exciton dispersion of MoS<sub>2</sub> derived by  $q$  dependent BSE loss functions.

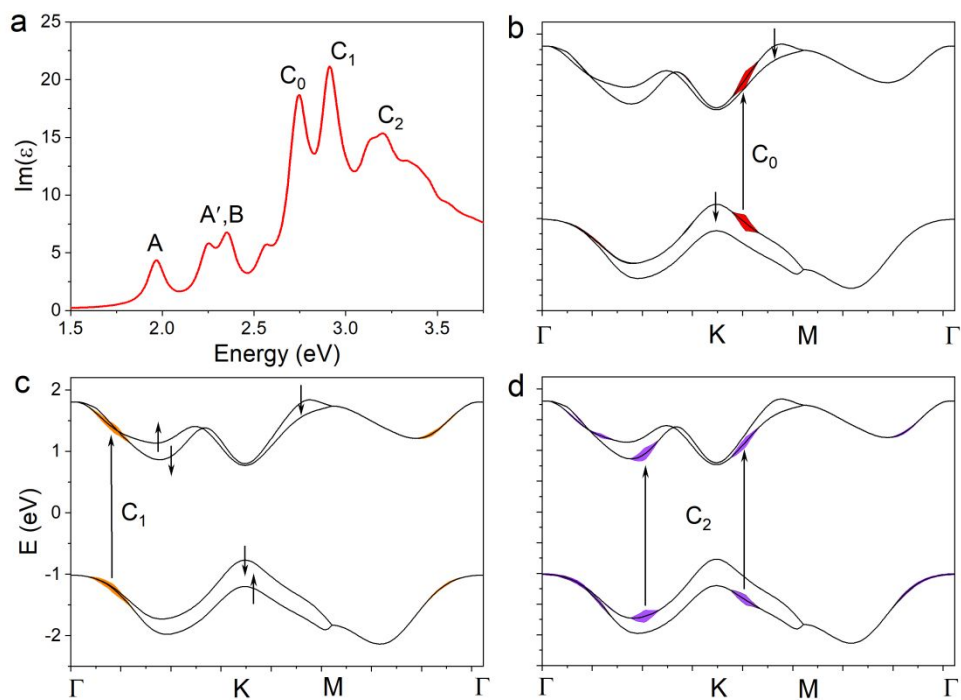

**Figure S5.** (a) BSE calculated absorption of WS<sub>2</sub> monolayer. (b-d) Excitonic weights projected onto the band structure of WS<sub>2</sub> with SOC included. The short arrows indicate the spin polarizations of each band, and long arrows show the transitions responsible for the multi-C peaks.

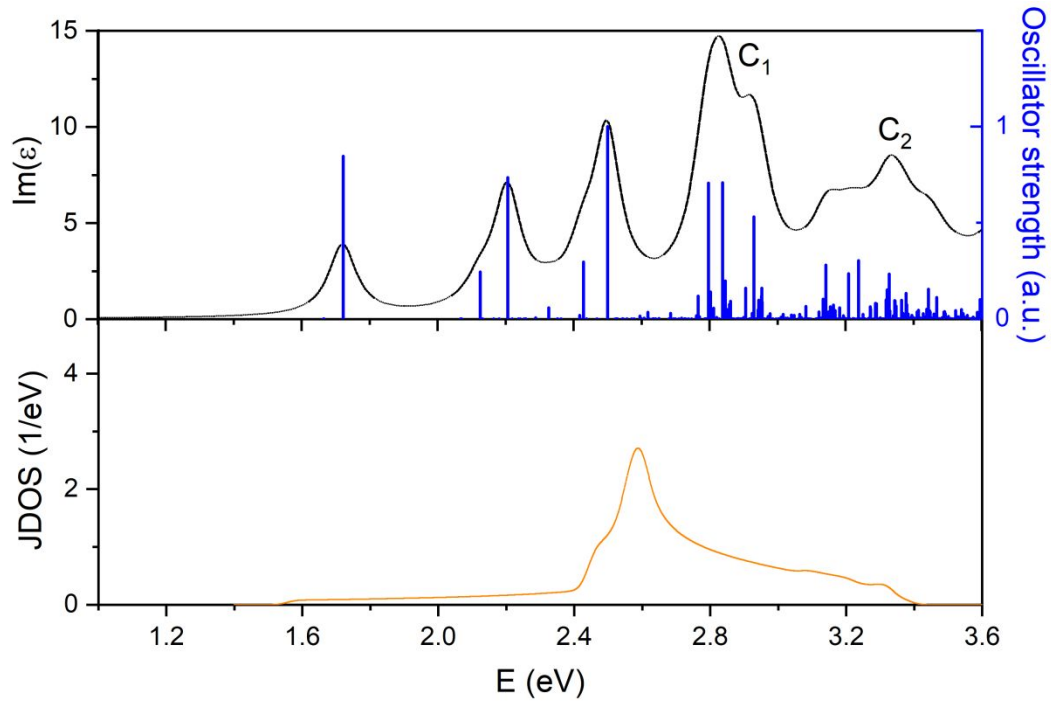

**Figure S6.** Oscillator strength (blue vertical bars) of each exciton in monolayer WSe<sub>2</sub>. Note the absorption  $\text{Im}(\epsilon)$  show intense peaks with large oscillator strength situated at energy positions far away from that of the DFT calculated JDOS peak. This is different from the case in Mo-DCs, where the band-nesting C peak results from the amplification of the high JDOS (joint density of states).

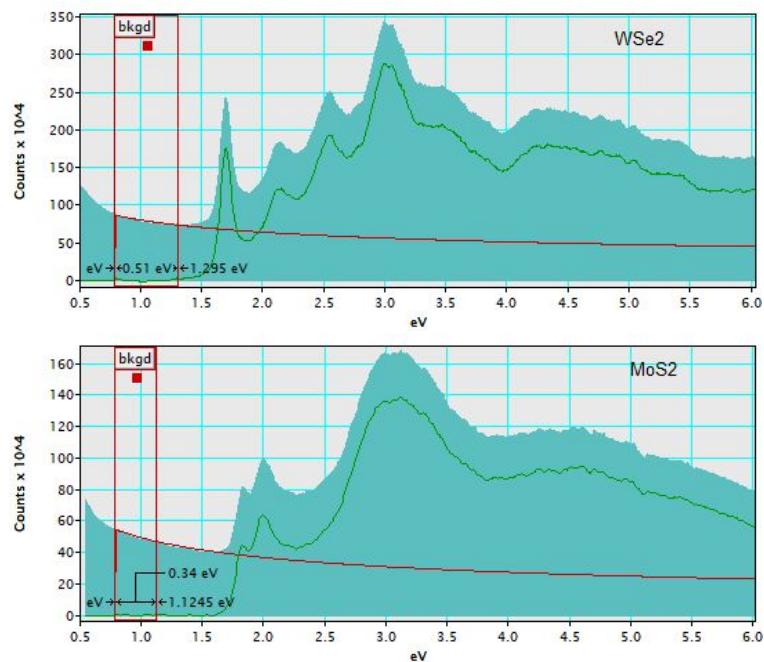

**Figure S7.** Power-law fitted removal of the zero-loss peak (ZLP) tail. Actually, the peak positions and line shapes will not be affected whether one remove the ZLP-tail background or not.
